# Supplementary material
Source: ML conference proceedings conference paper supplement (https://proceedings.mlr.press/v161/schein21a.html)
Supplement: Supplementary file 1 [file schein21a-supp.pdf]

# Doubly Non-Central Beta Matrix Factorization for DNA Methylation Data (Supplementary material)

Aaron Schein<sup>1</sup>

Anjali Nagulpally<sup>2</sup>

Hanna Wallach<sup>3</sup>

Patrick Flaherty<sup>2</sup>

<sup>1</sup>Data Science Institute, Columbia University

<sup>2</sup>Department of Mathematics and Statistics, University of Massachusetts Amherst

<sup>3</sup>Microsoft, New York City, NY

## A THE DNCB DISTRIBUTION

The DNCB distribution is defined in definition 1 of the main paper. It can take the same set of shapes over the  $(0, 1)$  interval as the beta distribution (see fig. 1a), as well as tri-modal shapes when the shape parameters  $\epsilon_1, \epsilon_2 < 1$  (see fig. 1b).

Ongaro and Orsi [2015] provide a general formula for the moments of the DNCB distribution. Its first moment is

$$\mathbb{E}[\beta] = \frac{\epsilon_1}{\epsilon_\bullet e^{\lambda_\bullet}} \left[ {}_1F_1(\epsilon_\bullet; \epsilon_\bullet + 1; \lambda_\bullet) + \frac{\epsilon_\bullet \lambda_1}{\epsilon_1(\epsilon_\bullet + 1)} {}_1F_1(\epsilon_\bullet + 1; \epsilon_\bullet + 2; \lambda_\bullet) \right]$$

where  ${}_1F_1(\cdot; \cdot; \cdot)$  denotes Kummer’s confluent hypergeometric function. The second moment is more involved, but also does not involve any special functions beyond  ${}_1F_1(\cdot; \cdot; \cdot)$ .

Computing the mean and variance of the DNCB is easy because there are many efficient open-source implementations of  ${}_1F_1(\cdot; \cdot; \cdot)$ —e.g., in the Python library `scipy` [Virtanen et al., 2020]. On the other hand, computing the DNCB density, which we need to assess out-of-sample predictive performance (see section 5 of the main paper), requires computing Humbert’s confluent hypergeometric function  $\Psi_2[\cdot; \cdot; \cdot; \cdot; \cdot]$  for which we know of no open-source implementations. We therefore implemented the algorithm of Orsi [2017] in Cython. We have released our code for this, along with our implementations of DNCB-MF and BG-NMF and the real and synthetic datasets that we used for our experiments.<sup>1</sup>

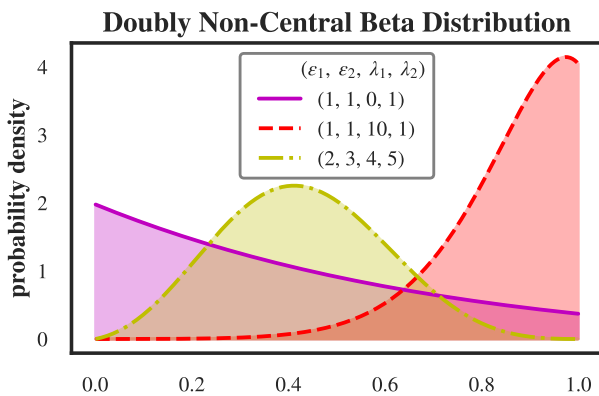

(a) With  $\epsilon_1, \epsilon_2 \geq 1$ , the DNCB distribution takes uni-modal or bi-modal shapes over  $(0, 1)$ , similar to the beta distribution; with  $\lambda_1 = \lambda_2 = 0$ , the DNCB distribution coincides with the beta distribution.

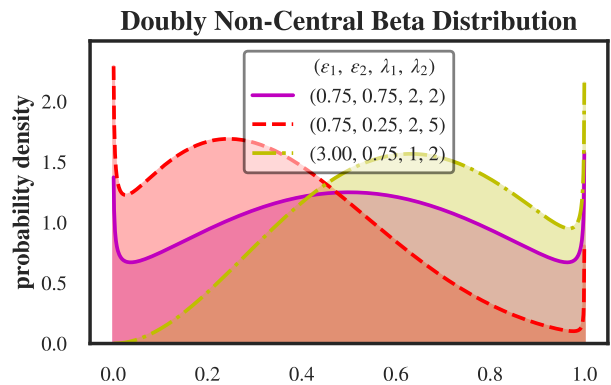

(b) The DNCB distribution can additionally take tri-modal shapes when  $\epsilon_1 < 1$  or  $\epsilon_2 < 1$ .

<sup>1</sup><https://github.com/aschein/dncb-mf>

## B POSTERIOR INFERENCE

Here, we provide a complete summary of our entire Gibbs sampler. As we described in section 4 of the main paper, the first step is to sample the gamma-distributed auxiliary variables:

$$(\gamma_{ij}^{(\bullet)} | -) \sim \text{Gam}(\epsilon_0^{(\bullet)} + y_{ij}^{(\bullet)}, 1), \quad (1)$$

$$\gamma_{ij}^{(1)} = \beta \gamma_{ij}^{(\bullet)} \quad \text{and} \quad \gamma_{ij}^{(2)} = (1 - \beta) \gamma_{ij}^{(\bullet)}. \quad (2)$$

The Poisson-distributed auxiliary variables are then conditionally independent Bessel random variables—i.e.,

$$(y_{ij}^{(r)} | -) \sim \text{Bess} \left( \epsilon_0^{(r)} - 1, 2 \sqrt{\gamma_{ij}^{(r)} \sum_{k=1}^K \theta_{ik}^{(r)} \phi_{kj}} \right) \quad (3)$$

for  $r \in \{1, 2\}$ . Conditioned on these auxiliary counts, the updates for the latent factors follow from gamma–Poisson matrix factorization. First, we represent each count as the sum of  $K$  subcounts—i.e.,  $y_{ij}^{(r)} = \sum_{k=1}^K y_{ijk}^{(r)}$ . By Poisson additivity, each of these subcounts is Poisson distributed and their complete conditional is a multinomial distribution:

$$\left( (y_{ijk}^{(r)})_{k=1}^K | - \right) \sim \text{Multi} \left( y_{ij}^{(r)}, \left( \frac{\theta_{ik}^{(r)} \phi_{kj}}{\sum_{k'=1}^K \theta_{ik'}^{(r)} \phi_{kj}} \right)_{k=1}^K \right). \quad (4)$$

By Poisson–gamma conjugacy, the complete conditionals of the latent factors, conditioned on the subcounts, are

$$(\theta_{ik}^{(r)} | -) \sim \text{Gam} \left( a_0 + \sum_{j=1}^M y_{ijk}^{(r)}, b_0 + \sum_{j=1}^M \phi_{kj} \right), \quad (5)$$

$$(\phi_{kj} | -) \sim \text{Gam} \left( e_0 + \sum_{i=1}^N \sum_{r=1}^2 y_{ijk}^{(r)}, f_0 + \sum_{i=1}^N \sum_{r=1}^2 \theta_{ik}^{(r)} \right). \quad (6)$$

Equations (1) to (6) summarize the entire Gibbs sampler for DNCB-MF. Iteratively following these steps is asymptotically guaranteed to sample from the exact posterior.

## References

Andrea Ongaro and Carlo Orsi. Some results on non-central beta distributions. *Statistica*, 75(1):85–100, 2015.

Carlo Orsi. New insights into non-central beta distributions. *arXiv preprint arXiv:1706.08557*, 2017.

Pauli Virtanen, Ralf Gommers, Travis E Oliphant, Matt Haberland, Tyler Reddy, David Cournapeau, Evgeni Burovski, Pearu Peterson, Warren Weckesser, Jonathan Bright, et al. Scipy 1.0: fundamental algorithms for scientific computing in Python. *Nature methods*, 17(3):261–272, 2020.
